# Supplementary material
Source: PubMed Central journal article supplement (PMC2943295)
Supplement: supp_M110.122812_jbc.M110.122812-1.pdf [file supp_M110.122812_jbc.M110.122812-1.pdf]

#### Supplementary table 1

Comparison of relative abundances of metabolites detected by GC/MS (white) and GCxGC-TOFMS (grey) of the WT and mutant *Stm6Glc4* before and during peak H<sub>2</sub> production. Relative masses used for detection and/or identification of each compound are indicated.

Different ratios of O<sub>2</sub> and H<sub>2</sub> peaks for adenosine and alanine were obtained by using the two different techniques.

#### Supplementary table 2

Statistical analyses (student's s t-test) for selected metabolites presented in the figures 2-7. Time points, which were used for student's s t-test are listed. Significance is shown by p-values, where p < 0.05 indicates statistically significance (\*), p < 0.01 indicates high significance (\*\*), and p < 0.001 indicated very high significance (\*\*\*) of the data.

#### Supplementary table 3-6

Compounds of two different sample groups with Fisher ratios higher than 1000, as determined with the '*statistical compare*' feature of the LECO ChromaTOF® software v.4.22.

| compound              | relative masses | WT Peak O <sub>2</sub> | WT Peak H <sub>2</sub> | <i>Stm6Glc4</i> Peak O <sub>2</sub> | <i>Stm6Glc4</i> Peak H <sub>2</sub> |
|-----------------------|-----------------|------------------------|------------------------|-------------------------------------|-------------------------------------|
| adenine               | 264             | 0.99                   | 0.54                   | 1.22                                | 0.77                                |
| adenosine             | 236             | 183.44                 | 38.67                  | 146.34                              | 23.35                               |
| adenosine             | 236             | 0.25                   | 0.22                   | 0.29                                | 0.30                                |
| alanine               | 116             | 11553.76               | 6875.92                | 8004.28                             | 22256.66                            |
| alanine               | 116             | 4.43                   | 4.29                   | 3.99                                | 7.66                                |
| alpha-tocopherol      | 502             | 1.15                   | 2.20                   | 0.98                                | 0.88                                |
| asparagine            | 115             | 85.26                  | 8.99                   | 15.83                               | 6.43                                |
| aspartate             | 232             | 274.59                 | 605.31                 | 494.55                              | 672.47                              |
| aspartate             | 232             | 0.50                   | 0.92                   | 0.33                                | 0.78                                |
| benzoate              | 119             | 35.18                  | 29.59                  | 43.52                               | 38.59                               |
| beta-alanine          | 248             | 0.00                   | 18.57                  | 0.00                                | 27.98                               |
| beta-alanine          | 248             | 0.20                   | 0.33                   | 0.08                                | 0.28                                |
| calystegine           | 216             | 2.79                   | 5.32                   | 2.54                                | 3.09                                |
| cholesterol           | 377             | 6.72                   | 6.19                   | 5.52                                | 2.95                                |
| citrate               | 257             | 0.22                   | 0.25                   | 0.08                                | 0.10                                |
| citrulline            | 142             | 36.15                  | 25.52                  | 21.27                               | 28.35                               |
| cysteine              | 220             | 36.18                  | n.d.                   | 31.55                               | n.d.                                |
| cysteine              | 220             | 0.30                   | 0.35                   | 0.32                                | 0.21                                |
| dehydroergosterol     | 251             | 254.21                 | 185.70                 | 354.95                              | 222.51                              |
| dihydroxyacetone-p    | 400             | 0.01                   | 0.04                   | 0.01                                | 0.01                                |
| disulfide             | 172             | 89.05                  | n.d.                   | 185.06                              | n.d.                                |
| ergosterol            | 363             | 10.55                  | 9.38                   | 8.75                                | 4.39                                |
| ethanolamine          | 174             | 10.62                  | n.d.                   | 25.49                               | n.d.                                |
| ethanolamine          | 174             | 2.37                   | 2.40                   | 1.63                                | 0.85                                |
| ethanolaminophosphate | 174             | 5668.06                | 455.30                 | 6559.70                             | 995.37                              |
| fructose-6-p          | 315             | 1.35                   | 4.02                   | 1.96                                | 3.84                                |
| fumarate              | 245             | 1.35                   | 0.37                   | 0.54                                | 0.36                                |
| galactose             | 319             | 4.97                   | 7.80                   | 7.82                                | 18.72                               |
| galactose             | 319             | 1.95                   | 2.42                   | 2.03                                | 4.62                                |
| galactosylglycerol    | 204             | 3.48                   | 4.03                   | 38.34                               | 24.47                               |
| glucose               | 319             | 20061.46               | 21860.72               | 24253.16                            | 45148.46                            |
| glucose               | 319             | 0.58                   | 3.53                   | 1.30                                | 5.76                                |
| glucose-6-p           | 387             | 2.32                   | 6.24                   | 2.35                                | 5.13                                |
| glucuronolactone      | 73              | 486.04                 | 140.63                 | 542.46                              | 0.00                                |
| glutamate             | 246             | 5834.15                | 2196.91                | 4048.32                             | 4097.35                             |
| glutamate             | 246             | 13.30                  | 4.76                   | 3.65                                | 4.88                                |
| glycerate             | 189             | 0.38                   | 0.45                   | 2.06                                | 0.98                                |
| glycerate-2-p         | 315             | 0.85                   | 1.13                   | 0.64                                | 0.73                                |
| glycerol-2-p          | 243             | 0.93                   | 1.40                   | 0.55                                | 1.27                                |
| glycerol-3-p          | 357             | 28.84                  | 38.64                  | 15.80                               | 18.54                               |
| glycine               | 174             | 81.39                  | 27.99                  | 7.50                                | 16.37                               |
| glycine               | 174             | 1.73                   | 1.38                   | 1.38                                | 1.66                                |
| guanine               | 352             | 1.57                   | 7.48                   | 2.44                                | 3.95                                |
| guanine               | 352             | n.d.                   | 3775.99                | n.d.                                | 3332.08                             |
| guanosine             | 324             | 27.84                  | 44.12                  | 35.73                               | 46.32                               |

| compound           | relative masses | WT Peak O <sub>2</sub> | WT Peak H <sub>2</sub> | <i>Stm6Glc4</i> Peak O <sub>2</sub> | <i>Stm6Glc4</i> Peak H <sub>2</sub> |
|--------------------|-----------------|------------------------|------------------------|-------------------------------------|-------------------------------------|
| homocysteine       | 234             | 7.91                   | 11.89                  | 4.22                                | 3.06                                |
| homoserine         | 218             | 47.74                  | n.d.                   | n.d.                                | n.d.                                |
| homoserine         | 218             | 0.55                   | 0.17                   | 0.26                                | 0.17                                |
| inositol           | 305             | 0.75                   | 0.68                   | 1.39                                | 1.74                                |
| inositol-2-p       | 318             | 6.61                   | 8.39                   | 5.77                                | 7.57                                |
| isoleucine         | 158             | 266.02                 | 699.41                 | 309.31                              | 1785.97                             |
| isoleucine         | 158             | 0.89                   | 2.17                   | 0.48                                | 4.03                                |
| leucine            | 158             | 269.22                 | 598.51                 | 424.16                              | 1296.76                             |
| linoleic acid      | 337             | 14.60                  | 62.50                  | 12.93                               | 34.04                               |
| linolenic acid     | 79              | 7.88                   | 37.46                  | 12.96                               | 21.76                               |
| lycopene           | 119             | 37.20                  | 9.26                   | 33.81                               | 11.06                               |
| lysine             | 156             | 2.33                   | 2.81                   | 1.13                                | 3.97                                |
| malate             | 245             | 7527.13                | 2210.30                | 5867.42                             | 3235.13                             |
| malate             | 245             | 2.29                   | 0.60                   | 1.23                                | 0.67                                |
| methionine         | 176             | 87.12                  | 11.65                  | 97.18                               | 17.70                               |
| oleic acid         | 339             | 28.68                  | 113.44                 | 59.72                               | 71.75                               |
| ornithine          | 174             | n.d.                   | n.d.                   | 0.00                                | 17.61                               |
| oxalate            | 147             | 15.96                  | n.d.                   | 33.71                               | n.d.                                |
| p-enolpyruvate     | 369             | 0.05                   | 0.06                   | 0.01                                | 0.02                                |
| palmitelaidic acid | 311             | 2.01                   | 17.79                  | 12.75                               | 22.05                               |
| palmitic acid      | 129             | 378.90                 | 455.33                 | 73.04                               | 151.62                              |
| palmitic acid      | 129             | 22.62                  | 118.79                 | 30.18                               | 68.07                               |
| pantothenate       | 237             | 81.53                  | 0.00                   | 96.26                               | 55.10                               |
| phenylalanine      | 192             | 781.05                 | 1426.69                | 933.08                              | 5402.33                             |
| phenylalanine      | 192             | 0.46                   | 0.98                   | 0.21                                | 1.42                                |
| phenylethanolamine | 174             | 25.88                  | n.d.                   | 24.19                               | n.d.                                |
| phytol             | 143             | 9.57                   | 3.03                   | 5.27                                | 1.54                                |
| phytol             | 143             | 1.96                   | n.d.                   | 5.52                                | n.d.                                |
| proline            | 142             | 0.67                   | 1.06                   | 0.63                                | 1.86                                |
| purin-2-amine      | 324             | 459.58                 | 332.51                 | 237.01                              | 620.81                              |
| putrescine         | 174             | 15.24                  | 1.37                   | 2.47                                | 0.56                                |
| pyrimidine         | 255             | 366.08                 | 213.48                 | 376.96                              | 173.82                              |
| pyroglutamate      | 156             | 3.76                   | 0.77                   | 2.22                                | 1.61                                |
| ribonate           | 217             | 36.81                  | 36.17                  | 77.03                               | 14.48                               |
| ribose             | 315             | 46.90                  | 10.86                  | 45.46                               | 10.72                               |
| serine             | 204             | 3.12                   | 3.20                   | 5.13                                | 4.13                                |
| stearic acid       | 110             | 249.46                 | 380.17                 | 507.00                              | 1316.12                             |
| stearic acid       | 110             | 13.60                  | 42.50                  | 17.23                               | 25.19                               |
| succinate          | 247             | 85.39                  | 8.36                   | 96.14                               | 18.32                               |
| succinate          | 247             | 1.24                   | 0.42                   | 0.73                                | 0.40                                |
| threonine          | 101             | 477.07                 | 579.79                 | 575.84                              | 2861.10                             |
| threonine          | 101             | 1.00                   | 1.10                   | 1.28                                | 2.63                                |
| tyrosine           | 218             | 0.70                   | 2.41                   | 0.48                                | 2.21                                |
| uracil             | 241             | 627.00                 | 218.83                 | 435.34                              | 393.39                              |
| uridine            | 217             | 1718.63                | 166.25                 | 3708.69                             | 1097.95                             |
| valine             | 144             | 70.19                  | 90.02                  | 988.96                              | 4732.28                             |
| valine             | 144             | 1.30                   | 2.53                   | 0.64                                | 3.20                                |

|                 |             | cysteine                   | serine                     | glutamate              | threonine     | aspartate        | lysine                | tyrosine                   |
|-----------------|-------------|----------------------------|----------------------------|------------------------|---------------|------------------|-----------------------|----------------------------|
| WT              | time points | a & e                      | a & b                      | a & b                  | a & e         | a & e            | a & e                 | a & e                      |
|                 | p value     | 0.694                      | 0.007824**                 | 0.4816                 | 0.2719        | 0.07105          | 0.2498                | 0.04441*                   |
| <i>Stm6Glc4</i> | time points | a & e                      | a & b                      | a & b                  | a & e         | a & e            | a & e                 | a & e                      |
|                 | p value     | 0.3435                     | 0.000681***                | 0.0008552***           | 0.0003947***  | 2.969e-05***     | 0.001323**            | 7.423e-05***               |
|                 |             | glycine                    | $\beta$ -alanine           | alanine                | proline       | valine           | phenylalanine         | isoleucine                 |
| WT              | time points | a & b                      | a & e                      | a & b; a & e           | a & e         | a & e            | a & e                 | a & e                      |
|                 | p value     | 0.07865                    | 0.00579**                  | 0.2513; 0.5578         | 0.066         | 0.06054          | 0.04964*              | 0.05531                    |
| <i>Stm6Glc4</i> | time points | a & b                      | a & e                      | a & b; a & e           | a & e         | a & e            | a & e                 | a & e                      |
|                 | p value     | 0.01093*                   | 0.01772*                   | 0.003019**; 0.002931** | 0.01085*      | 9.455e-05***     | 7.49e-05***           | 0.00002872***              |
|                 |             | glucose                    | glucose-6-p                | fructose-6-p           | 2-p-glycerate | glycerate        | citrate               | succinate                  |
| WT              | time points | a & e                      | a & e                      | a & e                  | a & e         | a & b            | a & b; b & e          | a & b; b & e               |
|                 | p value     | 0.005112**                 | 0.0778                     | 0.03377*               | 0.06996       | 0.246            | 0.08363; 0.09743      | 0.6839; 0.004021**         |
| <i>Stm6Glc4</i> | time points | a & e                      | a & e                      | a & e                  | a & e         | a & b            | a & b; b & e          | a & b; b & e               |
|                 | p value     | 0.05234                    | 0.02132*                   | 0.01195*               | 0.9227        | 0.004842**       | 0.002696**; 0.00399** | 0.0001878***; 3.645e-07*** |
|                 |             | fumarate                   | malate                     | myristic acid          | palmitic acid | palmitoleic acid | stearic acid          | oleic acid                 |
| WT              | time points | a & b; b & e               | a & b; b & e               | a & e                  | a & e         | a & e            | a & e                 | a & e                      |
|                 | p value     | 0.2129; 0.0008277***       | 0.5796; 0.01881*           | 6.785e-05***           | 0.001646**    | 9.317e-09***     | 0.001388**            | 0.001598**                 |
| <i>Stm6Glc4</i> | time points | a & b; b & e               | a & b; b & e               | a & e                  | a & e         | a & e            | a & e                 | a & e                      |
|                 | p value     | 4.452e-05***; 3.972e-06*** | 0.0001718***; 7.193e-06*** | 0.004134**             | 0.008143**    | 0.08523          | 0.05955               | 0.5679                     |
|                 |             | linoleic acid              | linolenic acid             | lipids                 | formate       | ethanol          | acetate               | starch                     |
| WT              | time points | a & e                      | a & e                      | a & e                  | a & e         | a & e            | a & c; c & e          | a & c; c & e               |
|                 | p value     | 0.001061**                 | 6.416e-05***               | 0.002263***            | 0.0006122***  | 0.04579*         | 2.195e-07***; 0.1856  | 0.0977; 0.01400*           |
| <i>Stm6Glc4</i> | time points | a & e                      | a & e                      | a & e                  | a & e         | a & e            | a & c; c & e          | a & c; c & e               |
|                 | p value     | 0.005336**                 | 0.1141                     | 0.0002314***           | 0.00192**     | 0.006015**       | 0.002488**; 0.1912    | 0.01860**; 0.1636          |

| <b>compounds WT Peak O<sub>2</sub><br/>vs. Peak H<sub>2</sub></b> |                                     |                      |                     |                     |
|-------------------------------------------------------------------|-------------------------------------|----------------------|---------------------|---------------------|
| <b>compound</b>                                                   | <b>retention time<br/>(1st dim)</b> | <b>relative mass</b> | <b>average area</b> | <b>Fisher ratio</b> |
| glucose                                                           | 3461.67                             | 73                   | 48254418.00         | 8245.2              |
| succinate                                                         | 1634.17                             | 247                  | 70300.89            | 7537.1              |
| malate                                                            | 1660.00                             | 147                  | 7604718.96          | 4272.00             |
| alpha tocopherol                                                  | 4455.00                             | 237                  | 2014090.54          | 3483.2              |
| panthothenate                                                     | 2671.67                             | 103                  | 105694743.00        | 3320.7              |
| adenosine                                                         | 4110.00                             | 236                  | 172880241.00        | 2276.7              |
| 5-oxo-proline                                                     | 1725.83                             | 156                  | 15048263.00         | 2237.2              |
| valine                                                            | 1644.17                             | 144                  | 5398967.86          | 2189.3              |
| serine                                                            | 1234.17                             | 116                  | 1007140.24          | 1548.7              |
| isoleucine                                                        | 1300.00                             | 158                  | 1619566.89          | 1510.1              |
| ethanolaminophosphate                                             | 2216.67                             | 73                   | 8475081.28          | 1381.1              |
| uridine                                                           | 3651.67                             | 217                  | 1631691.92          | 1195.1              |
| uracil                                                            | 1389.17                             | 99                   | 661900902.00        | 1144.9              |
| alanine                                                           | 937.5                               | 116                  | 14526345.7          | 1069.4              |

S 4

| <b>compounds <i>Stm6Glc4</i></b>                 |                                     |                      |                     |                     |
|--------------------------------------------------|-------------------------------------|----------------------|---------------------|---------------------|
| <b>Peak O<sub>2</sub> vs. Peak H<sub>2</sub></b> |                                     |                      |                     |                     |
| <b>compound</b>                                  | <b>retention time<br/>(1st dim)</b> | <b>relative mass</b> | <b>average area</b> | <b>Fisher ratio</b> |
| valine                                           | 1644.17                             | 144                  | 4403594.76          | 8224.60             |
| isoleucine                                       | 1300.00                             | 158                  | 3236383.42          | 5981.80             |
| succinate                                        | 1635.00                             | 247                  | 69761.59            | 5820.30             |
| guanine                                          | 3000.83                             | 73                   | 6080253.20          | 5327.10             |
| alpha tocopherol                                 | 4450.00                             | 237                  | 3867248.50          | 3688.40             |
| ethanolaminephosphate                            | 2217.50                             | 174                  | 1083760.34          | 2582.10             |
| phenylalanine                                    | 1779.17                             | 120                  | 4112024.10          | 2133.00             |
| alanine                                          | 936.67                              | 116                  | 19298620.50         | 1974.50             |
| adenosine                                        | 4110.00                             | 236                  | 116556.40           | 1747.80             |
| oleic acid                                       | 3707.50                             | 98                   | 161770.42           | 1408.40             |
| lycopene                                         | 4540.00                             | 73                   | 682505.30           | 1324.90             |
| proline                                          | 930.83                              | 142                  | 161294.53           | 1294.40             |

| <b>compounds WT vs. <i>Stm6Glc4</i> Peak O<sub>2</sub></b> |                                     |                      |                     |                     |
|------------------------------------------------------------|-------------------------------------|----------------------|---------------------|---------------------|
| <b>compound</b>                                            | <b>retention time<br/>(1st dim)</b> | <b>relative mass</b> | <b>average area</b> | <b>Fisher ratio</b> |
| malate                                                     | 1660.00                             | 147                  | 9866932.90          | 3978.30             |
| alpha tocopherol                                           | 4450.00                             | 237                  | 359363.61           | 2954.10             |
| isoleucine                                                 | 1300.00                             | 158                  | 736315.93           | 1963.80             |
| 5-oxo-proline                                              | 1727.50                             | 156                  | 18913489.20         | 1742.20             |
| succinate                                                  | 1635.00                             | 247                  | 132462.82           | 1555.30             |
| valine                                                     | 1644.17                             | 144                  | 3501257.66          | 1507.30             |
| uridine                                                    | 3651.67                             | 73                   | 3897341.15          | 1424.90             |
| panthothenate                                              | 2672.50                             | 103                  | 156717.31           | 1372.00             |
| linoleic acid                                              | 1742.50                             | 110                  | 228237.06           | 1129.30             |
| glutarate                                                  | 1731.00                             | 129                  | 158108.07           | 1117.00             |

| compounds WT vs. <i>Stm6Glc4</i> Peak H <sub>2</sub> |                             |               |              |              |
|------------------------------------------------------|-----------------------------|---------------|--------------|--------------|
| compound                                             | retention time<br>(1st dim) | relative mass | average area | Fisher ratio |
| alpha tocopherol                                     | 4455.00                     | 237           | 3042447.11   | 22365.00     |
| palmitelaidic acid                                   | 2691.67                     | 117           | 6763813.94   | 18932.00     |
| mannose                                              | 2484.17                     | 205           | 2878628.60   | 10628.00     |
| ethanolaminephosphate                                | 2217.50                     | 174           | 1011275.86   | 5864.30      |
| serine                                               | 1235.00                     | 116           | 1266010.33   | 4538.50      |
| linoleic acid                                        | 3337.50                     | 67            | 157069.45    | 3752.80      |
| pantothenate                                         | 2672.00                     | 103           | 81658.07     | 3346.10      |
| myo-inositol                                         | 2917.50                     | 73            | 7800011.07   | 2997.70      |
| stearic acid                                         | 4515.00                     | 55            | 19901.76     | 2695.30      |
| adenosine                                            | 4111.67                     | 236           | 46649.33     | 2517.60      |
| uracil                                               | 1389.17                     | 99            | 431532.19    | 1990.20      |
| uridine                                              | 3652.50                     | 73            | 1012846.84   | 1873.10      |
| alanine                                              | 935.83                      | 116           | 19905225.40  | 1851.90      |
| phenylalanine                                        | 1775.83                     | 120           | 4633075.55   | 1715.10      |
| oleic acid                                           | 3707.50                     | 103           | 887364.68    | 1686.50      |
| glucose                                              | 3462.50                     | 73            | 61764171.10  | 1621.90      |
| glyoxylate                                           | 866.67                      | 100           | 125028.53    | 1522.10      |
| malate                                               | 1660.00                     | 147           | 3885276.12   | 1334.40      |
| isoleucine                                           | 1300.00                     | 158           | 3702956.46   | 1291.10      |
| proline                                              | 1825.83                     | 142           | 238568.14    | 1187.00      |
| palmitic acid                                        | 3067.50                     | 56            | 533773.78    | 1039.60      |
| 5-oxo-proline                                        | 1725.83                     | 156           | 13872675.10  | 1008.00      |
